# Supplementary material for: Hyperammonaemia induces mitochondrial dysfunction and neuronal cell death
Source: PubMed Central journal article supplement (PMC9278080; doi:10.1016/j.jhepr.2022.100510), 2022-05-23
Supplement: mmc1.pdf [file mmc1.pdf]

# **Hyperammonaemia induces mitochondrial dysfunction and neuronal cell death**

Plamena R. Angelova, Annarein J.C. Kerbert, Abeba Habtesion, Andrew Hall, Andrey Y. Abramov, Rajiv Jalan

Table of contents

Table S1.....2

1.

**Table S1. Plasma levels of ammonia, bilirubin and ALT in a BDL rat model with and without OP treatment as we previously reported in Hadjihambi et al. 2017.**

| <b>Parameters</b>         | <b>Sham (n=22)</b> | <b>BDL (n=26)</b> | <b>BDL+OP (n=14)</b> |
|---------------------------|--------------------|-------------------|----------------------|
| <b>Ammonia (umol/L)</b>   | 56±3               | 141±4             | 60±2                 |
| <b>Bilirubin (umol/L)</b> | 5±0.5              | 205±3             | 161±6                |
| <b>ALT (U/L)</b>          | 11±0.4             | 130±2             | 87±4                 |
